# Supplementary material for: A Novel Form of Progressive Retinal Atrophy in Swedish Vallhund Dogs
Source: PLoS One. 2014 Sep 8;9(9):e106610. doi: 10.1371/journal.pone.0106610 (PMC4157785; doi:10.1371/journal.pone.0106610)
Supplement: Table S2 — Primers used to amplify microsatellite markers. (XLSX) [file pone.0106610.s003.xlsx]

## Sheet: Sheet1
Table S2. Primers used to amplify microsatellite markers.
Canine disease	Gene	Name of microsatellite	Canine chromosome	Position on canine chromosome*	Repeat motif	Primer 1 (5'–3')	Primer 2 (5'–3')	Annealing T (°C)
cmr	BEST1	BEST1_18_57.81	18	57.81	(AG)20	TGACCGGCAGCAAAATTGAGAACCACCTACTGCATCAGC	TTTTCCTGGAGTGTGCTTCC	56
		BEST1_18_57.49	18	57.49	(AC)23	TGACCGGCAGCAAAATTGCAAATCCTGACCAGCAAAGG	GGCTGTGGCTAAAGTTGACC	56
cd	CNGB3	CNGB3_29_35.82	29	35.82	(AC)22	TGACCGGCAGCAAAATTGCATAATCCAGAGCAAGAAATGC	TGGGTGTATAACGGTGAAGG	54
		CNGB3_29_35.86	29	35.86	(GA)19	TGACCGGCAGCAAAATTGTTTGTGGTATGCCTGGAAGG	TTCTAAAGCCATCGGGAATG	54
crd	NPHP4	NPHP4_5_GATG	5	62.75	(GATG)16	TGACCGGCAGCAAAATTGCCATGAAGGCAAAGAGTGCT	CAAAAGGCAGAGGAGTCAGG	62
		NPHP4_5_ATGA	5	62.86	(ATGA)11	TGACCGGCAGCAAAATTGTGTCATGGTTCTGTCCATGC	ACTCCTCTGGGGCCTAGTTC	62
		NPHP4_5_AAAG	5	62.87	(AAAG)23	TGACCGGCAGCAAAATTGGTTGAGATCCAGTCCCAAGC	TGACTGGTGCATGTGTGCTA	58
		NPHP4_5_ATAA	5	62.90	(ATAA)13	TGACCGGCAGCAAAATTGGGTCCTTTCTCCCCAAGAAG	ATCTGAGCCCCCTCCTGTAG	62
rcd1	PDE6B	PDE6B_3_94.18	3	94.18	(TC)23	TGACCGGCAGCAAAATTGTACATGGAGCCTGCTTCTCC	GTCCCCACATCCCTTATTCC	54
		PDE6B_3_94.64	3	94.64	(GT)17	TGACCGGCAGCAAAATTGATCGCTTTGGCTATTTGAGG	AACCAGGGAGGTGAAAGACC	56
rcd3	PDE6A	PDE6A_4_62.31	4	62.31	(CA)18	TGACCGGCAGCAAAATTGTTGTTCGATGACCAAAATGC	ACGTGTGGTGCTTTATGTGC	56
		PDE6A_4_62.47	4	62.47	(TC)23	TGACCGGCAGCAAAATTGAGAGGGACAGGTAGGGATGG	ACTCTTGATCTCCGCTCAGG	56
PRCD	PRCD	PRCD_9_7.28	9	7.28	(TC)21	TGACCGGCAGCAAAATTGGCAACCGCCACTCTACTCTC	TAGCCAACACATGGAAGCAG	56
		PRCD_9_7.11	9	7.11	(GA)21	TGACCGGCAGCAAAATTGAATGGTTTGCCCACTTACTTAC	GGGCGCAATACTGGAGTC	56
RPE65	RPE65	RPE65_6_79.87	6	79.87	(GT)17	TGACCGGCAGCAAAATTGACTTTTGCTGCAGTGAGTCC	CACTGGGGTGGAGTTGTAGC	56
		RPE65_6_79.98	6	79.98	(TG)18	TGACCGGCAGCAAAATTGGGATCGAGTCCCATGTCG	CACCGACGCTGAATTTTACC	56
*All marker positions stated in megabases (Mb) refer to positions identified in the whole genome sequence assembly (CanFam2.0: http://www.ensembl.org/Canis_familiaris/).
